# Supplementary material for: Barriers and enablers to physical activity in patients during hospital stay: a scoping review
Source: Springer Nature journal article supplement (doi:10.1186/s13643-021-01843-x), 2021-11-04
Supplement: MOESM2 [file 19829968]

**Additional File 2. Search terms**

The search strategy included the following terms and concepts: ‘hospitalization’, ‘physical activity’, ‘mobility’, ‘ambulation’, ‘walking’, ‘barrier’, ‘enabler’, ‘motivator’, and ‘facilitator’. This resulted in the following search strings:

**Pubmed (MEDLINE)**

("Hospitalization"[Mesh] OR "Inpatients"[Mesh] OR "Adolescent, Hospitalized"[Mesh] OR "Hospital Units"[Mesh] OR hospitalization[tiab] OR hospitalisation[tiab] OR hospitalized[tiab] OR hospitalised[tiab] OR hospital environment[tiab] OR hospital stay\*[tiab] OR hospital setting\*[tiab] OR medical ward\*[tiab])

AND

("Motor Activity"[Mesh] OR "Early Ambulation"[Mesh] OR physical activit\*[tiab] OR physical function\*[tiab] OR mobility[tiab] OR mobilis\*[tiab] OR mobiliz\*[tiab] OR exercis\*[tiab] OR motor activit\*[tiab] OR walking[tiab] OR ambulat\*[tiab])

AND

(barrier\*[tiab] OR enabl\*[tiab] OR facilitat\*[tiab] OR motivat\*[tiab])

AND

(english[Language] OR dutch[Language])

NOT

((("Animals"[Mesh] OR "Invertebrates"[Mesh] OR "Plants"[Mesh] OR "Fungi"[Mesh] OR "Animal Experimentation"[Mesh] OR "Models, Animal"[Mesh] OR animal experiment\*[tiab] OR animal model\*[tiab]) NOT "Humans"[Mesh])

**Embase (ovid)**

| # | Searches                                                                                                                                                                                                                                                    |
|---|-------------------------------------------------------------------------------------------------------------------------------------------------------------------------------------------------------------------------------------------------------------|
| 1 | hospitalization/ or exp hospital patient/ or exp *"hospital subdivisions and components"/ or (hospitalization or hospitalisation or hospitalized or hospitalised or hospital environment or hospital stay* or hospital setting* or medical ward*).ti,ab,kw. |
| 2 | exp motor activity/ or mobilization/ or (physical activit* or physical function* or mobility or mobilis* or mobiliz* or exercis* or motor activit* or walking or ambulat*).ti,ab,kw.                                                                        |

|   |                                                                                                                                                                              |
|---|------------------------------------------------------------------------------------------------------------------------------------------------------------------------------|
| 3 | (barrier* or enabl* or facilitat* or motivat*).ti,ab,kw.                                                                                                                     |
| 4 | 1 and 2 and 3                                                                                                                                                                |
| 5 | limit 4 to (dutch or english)                                                                                                                                                |
| 6 | (exp animal/ or exp invertebrate/ or exp plant/ or exp fungus/ or exp animal experiment/ or exp animal model/ or (animal experiment* or animal model*).ti,ab,kw.) not human/ |
| 7 | 5 not 6                                                                                                                                                                      |
| 8 | limit 7 to conference abstract status                                                                                                                                        |
| 9 | 7 not 8                                                                                                                                                                      |

### **PscycINFO (ovid)**

| # | Searches                                                                                                                                                                                                         |
|---|------------------------------------------------------------------------------------------------------------------------------------------------------------------------------------------------------------------|
| 1 | exp hospitalization/ or hospitalized patients/ or (hospitalization or hospitalisation or hospitalized or hospitalised or hospital environment or hospital stay* or hospital setting* or medical ward*).ti,ab,id. |
| 2 | exp physical activity/ or (physical activit* or physical function* or mobility or mobilis* or mobiliz* or exercis* or motor activit* or walking or ambulat*).ti,ab,id.                                           |
| 3 | (barrier* or enabl* or facilitat* or motivat*).ti,ab,id.                                                                                                                                                         |
| 4 | 1 and 2 and 3                                                                                                                                                                                                    |
| 5 | limit 4 to (dutch or english)                                                                                                                                                                                    |

### **Cochrane Library**

- ID Search
- #1 MeSH descriptor: [Inpatients] explode all trees
- #2 MeSH descriptor: [Adolescent, Hospitalized] explode all trees
- #3 MeSH descriptor: [Hospital Units] explode all trees
- #4 (hospitalization or hospitalisation or hospitalized or hospitalised or hospital environment or hospital stay\* or hospital setting\* or medical ward\*).ti,ab,kw
- #5 #1 or #2 or #3 or #4
- #6 MeSH descriptor: [Motor Activity] explode all trees

- #7 MeSH descriptor: [Early Ambulation] explode all trees
- #8 (physical activit\* or physical function\* or mobility or mobilis\* or mobiliz\* or exercis\* or motor activit\* or walking or ambulat\*):ti,ab,kw
- #9 #6 or #7 or #8
- #10 (barrier\* or enabl\* or facilitat\* or motivat\*):ti,ab,kw
- #11 #5 and #9 and #10 in Cochrane Reviews, Trials
- #12 ((clinicaltrials or trialsearch)):so
- #13 #11 not #12

**CINAHL (Ebsco):**

Language: Dutch/Flemish, English

(MH "Hospitalization+") OR (MH "Inpatients") OR (MH "Adolescent, Hospitalized") OR (MH "Hospital Units+") OR ( TI ( hospitalization or hospitalisation or hospitalized or hospitalised or hospital environment or hospital stay\* or hospital setting\* or medical ward\* ) OR AB ( hospitalization or hospitalisation or hospitalized or hospitalised or hospital environment or hospital stay\* or hospital setting\* or medical ward\* ) )

AND

(MH "Motor Activity+") OR (MH "Early Ambulation") OR ( TI ( physical activit\* or physical function\* or mobility or mobilis\* or mobiliz\* or exercis\* or motor activit\* or walking or ambulat\* ) OR AB ( physical activit\* or physical function\* or mobility or mobilis\* or mobiliz\* or exercis\* or motor activit\* or walking or ambulat\* ) )

AND

TI (barrier\* or enabl\* or facilitat\* or motivat\* ) OR AB ( barrier\* or enabl\* or facilitat\* or motivat\* )

NOT

(( (MH "Animals+") OR (MH "Models, Biological") OR (MH "Fungi+") OR (MH "Invertebrates+") OR (MH "Plants+" ) ) OR ( TI ( animal experiment\* or animal model\* ) OR AB ( animal experiment\* or animal model\* ) ) ) NOT (MH "Human")
