# Supplementary material for: Barriers and enablers to physical activity in patients during hospital stay: a scoping review
Source: Syst Rev. 2021 Nov 4;10:293. doi: 10.1186/s13643-021-01843-x (PMC8569983; doi:10.1186/s13643-021-01843-x)
Supplement: Supplementary file 5 — Additional file 5. Data extraction. Excel file presenting all extracted data from included studies. [file 13643_2021_1843_MOESM5_ESM.xlsx]

## Sheet: Sheet1
Author, year of publication	Intervention (if used)	Barriers reported by patients	Barriers reported by healthcare professionals	Enablers reported by patients	Enablers reported by healthcare professionals
Alawadi et al, 2016 [45]	Not applicable	Not applicable	Category 'Limited resources': limited resources included: equipment nursing staff, and space. Illustrative quotes: 'I think we have problems with nursing staff at night to get them out of bed, and they say they need PT. We need probably more resources to be able to get the patient out of bed' (Faculty #3). 'There is too low staffing to promote ambulation. Low space means patients are boarded in P…	Category: 'Welcomed early mobilization' Context: Queried on what is important to recovery 8 patients identified the ERAS intervention of early mobilization. 'Illustrative quotes: 'I guess getting up and moving '(#2) 'Do exercise, eat healthy, eat what the doctor tells me to.' (#16) 'Walk, walk, walk around the sidewalks'. (#3). Category: 'Welcomed speedier recovery and release' Context: In respon…	Not applicable
Andreasen et al, 2018 [46]	An investigator-developed intervention Training and Eating for Medical Patients study (TEMP) was initiated over a 10-month period at a medical ward. The intervention consisted of four core elements: teaching nursing staff to acquire knowledge and competences in relation to mobilization, physical activity and nutrition; advising staff about nutritional advice and physical activity targeting indivi…	The situation describes how the patients felt that their illness and related circumstances had a negative impact on adherence to the intervention. They did not proceed with the self-training program or ambulation, or the protein supplementation in the evenings and at weekends. Visitors, illness, and impaired physical condition were considered great barriers to performing exercises after daytime r…	Nursing staff repeatedly mentioned 'Time Barriers' as a factor that continually affected their own motivation and adherence to the intervention for health-promoting practice barriers. The nurses felt that their daily tasks on the ward were numerous and they were forced to prioritize. “But we cannot do it in our daily practice. It is medicine and it is the changing of diapers and it is Ms. Hansen,…	The 'Becoming Aware' theme describes how the patients exprienced the intervention as meaningful, with a positive impact on their health, and they expressed an understanding of the importance of the initiative. “I find this thinking about taking physical activity and nutrition seriously from the point when you are very ill; if you hope to recover, that is really the right thinking!” The training a…	The physiotherapist and dietician provided new insights, which changed their focus from preventing complications to promoting healthy options regarding physical activity and nutrition. “I am still surprised that the percentages that H (the physiotherapist) put forward … how much bed rest means for muscle mass and things like that. And that is quite an eye-opener, that, okay I may use five minutes…
Babine et al, 2019 [47]	HELP is an evidenced-based program that has been adopted and implemented worldwide over the past two decades. It is aimed preventing delirium and functional decline in hospitalized older adults by utilizing specially trained volunteers. The program has a multidisciplinary and multi-interventional approach. The HELP team generally consists of an elder life specialist, an elder life nurse specialis…	Not applicable	When queried, the HELP sites identified barriers that prevented ambulation with volunteers. Eighteen percent (18%) recognized volunteer training, safety, and liability concerns as issues precluding ambulation.	Not applicable	Not applicable
Boltz et al, 2010 [20]	Not applicable	Barriers to independence are described. Code: ‘Nature of the ailment’. Illustrative quotes: “feeling bad from low blood sugar, pain, weakness and dizziness”. One participant declared: "You feel unwell. That’s why you’re there. You want to just lay there. Nurses should help you get up, maybe not right away, but when the condition is under control". Code: ‘Fear of falling’. Illustrative quotes: “Yo…	Not applicable	“The therapist in the hospital asked what I did during the day. He gave me exercises to help me build up my leg strength because I love to walk. I walk to church, the centre, the store, the park. I like to keep moving. Code: ‘Not having to rely on others’ also described expectations: as one participant said: I didn’t want to go home and have to ask for help. I knew help wasn’t going to be there f…	Not applicable
Boltz et al, 2011 [16]	Not applicable	Not applicable	The patient care associates (PCA) described the hospitalization as stressful, emphasizing that the emotional status of older patients as an important influence on physical function. One PCA stated, “Emotions play a role. My older patients with depression don't do as well. They don't eat, don't want to move, and it's hard to keep get them going.” Another PCA said, “Some older patients are lonely, …	Not applicable	Theme: Coaching and Caring: Both groups emphasized the importance of patient education to promote physical function in older adults. The need to educate patients about the risk of functional decline and the steps to prevent its occurrence was discussed. As one nurse stated, “You need to explain why it is important to get out of bed and to be involved in self-care. I say to my patients, ‘who is go…
Boltz et al, 2014 [48]	Not applicable	The manifestations of the acute illness often influenced physical activity. Symptoms that were associated with activity restriction included pain, visual problems, dyspnea and low energy. One person said, ‘I am too sick to care. I’m here because I’m sick’. Another reported, ‘I’m not worried about that now. I’m here to get the infection treated, and rest, and get home’. Often participants describe…	Not applicable	The majority (n = 27) of the participants felt that it was important to be mobile during the hospital stay, describing the desire to ‘not get weak’, ‘don’t want sea legs, need to get back to work’, and ‘get my strength back’. Self-directed activity to promote mobility included pacing the amount of activity to deal with symptoms, including dyspnoea, weakness and fatigue, and to move safely. A part…	Not applicable
Bradley et al, 2019 [49]	Not applicable	An observed implication for one patient was that, when listed for a bed on the rehabilitation ward, he became a lower priority for rehabilitative interventions whilst waiting. The ward physiotherapist discussed “handing him over to the assistant,” reflecting that he was now a lower priority because he would not be discharged imminently. This was echoed by the ward occupational therapist who becam…	The expressions of “waiting for” or “listed for” rehabilitation suggested that it was the next place of care, and hence the move away from the identified ward, which would result in the provision of rehabilitation. During observations, one physiotherapist highlighted that “[a patient] could potentially make good progress with intensive rehab but don’t feel we have that here.” Developing this, the…	Participants conceptualised rehabilitation as something that facilitated physical improvements.	The entry in the clinical record recommended one-to-one activities and engagement with staff, although it was subsequently discussed by a member of the ward team that this “would be nice to do, but not realistic.”
Brown et al, 2007 [15]	Not applicable	Lack of patient motivation, lack of ambulatory devices, and medical reasons necessitating bed rest were reported more frequently by health care providers than by patients. Symptoms were spontaneously mentioned by 97% of participants (28 of 29) as a cause of limited mobility, with weakness cited most frequently: “I know it is going to be painful (to walk). My head swims. This side of my— all up an…	Lack of patient motivation, lack of ambulatory devices, and medical reasons necessitating bed rest were reported more frequently by health care providers than by patients. Symptoms were spontaneously mentioned by 97% of participants (28 of 29 patients and HCP) as a cause of limited mobility, with weakness cited most frequently: “I know it is going to be painful (to walk). My head swims. This side…	Not applicable	Among staff, the most frequently mentioned solution was to refer patients to physical therapy, a strategy endorsed equally by nurses and physicians: “That is why we try to encourage the doctors to order physical therapy, because we don’t have time to ambulate patients in the hallway like the doctor expects.”
Chan et al, 2019 [50]	Not applicable	Not applicable	Code ‘Patient and family-based barriers - Adoption of ‘sick role’ behaviors’: nurses lamented about patients who appeared to have assumed the ‘sick role’ behaviors as this was seen as a barrier to physical activity. A nurse moaned about patients who do not even want to move their hands, such that someone has to “feed them” and that “they even require nurses to wipe their faces.” There are times w…	Not applicable	Code ‘Seeing physical activity as a fundamental facet of nursing’: enabling physical activity was seen as a fundamental facet of nursing with participants unanimously assented to the significance of engaging hospitalized older patients in physical activity to prevent functional decline. The older patients tend to decondition easily (thus) it is important to encourage them to (perform physical act…
Cheah et al, 2011 [83]	Not applicable	Not applicable	Not applicable	When discussing re-engaging in occupations both while in the hospital and following discharge, all participants wanted to be able to get back to the lives they remembered living before hospitalisation. Recovery and wellness – and therefore getting home again – were the most frequently mentioned motivators. Some participants talked about having a goal to work towards or roles from life before hosp…	Not applicable
Clarke et al, 2017 [51]	Not applicable	When asked whether they would like activities on the ward, a common concern was how these would ‘fit in’ with a ward routine that was perceived to be the priority: ‘You have to fit in with doctors, mealtimes, visiting hours, I don’t know how you’d cope with it [doing activities]’ (Rosemary); ‘I don’t see how there could be time’ (Kath); ‘The system is utterly comprehensive, I can’t imagine how yo…	Not applicable	The majority of participants wanted to engage in activities, believing it would ‘help fill the days and make the time go quicker’ (Janet). They suggested that willingness to engage would, however, depend on ‘what you like’ (Louise), indicating that activities needed to be meaningful. It was noteworthy that most of the women appeared more willing to try activities than the men and made more sugges…	Not applicable
Cook et al, 2009 [52]	Not applicable	Not applicable	Many participants reported that mobilization was important, though difficult to achieve. They also expressed uncertainty about whether, and how much, mobilization is enough. Level of mobility is a subjective matter. . . . When it comes to the question of ‘‘Well, how mobile is mobile enough?’’, that’s not standardized to my knowledge and is very subjective as far as when to stop it. Is getting up …	Not applicable	Sufficient human resources to ensure mobilization and profiling thromboprophylaxis during accreditation were regarded as administrative initiatives that could help. Capitalizing on social forces in healthcare such as patient safety could also galvanize efforts to prevent VTE. We need physio and [occupational therapy] OT. We need more rehab. We need resources. That’s what we’re lacking. The only p…
Dahlke et al, 2015 [53]	Not applicable	Not applicable	Nurses were most concerned for the safety of older adults who were physically unable to walk unaided, or who were in a state of delirium. They symbolized keeping these patients safe as preventing them from falling, or from interfering with equipment that was being used to treat a patient’s acute medical condition. To achieve this narrow definition of safety, nurses were often physically or chemic…	Not applicable	Enhancing function was regarded by nurses as assisting patients in progressing toward recovery and eventual discharge. Not only did the nurse see this goal as important for their patients to be successful following discharge from hospital, but the goal also fit with organizational expectations around moving patient through the system and out of the hospital. Enhancing function could include activ…
Dermody et al, 2017 [54]	Not applicable	Not applicable	• Attitude - Increasing mobilizations of my inpatients will be more work for nurses: 76/85 = 89% agrees / strongly agrees • External - Increasing the frequency of mobilizing my inpatients increases my risk for injury: 46/85 = 54% agrees / strongly agrees	Not applicable	• Knowledge - I have received training on how to safely mobilize my inpatients: 69/85 = 81% agrees / strongly agrees • Knowledge - I understand which inpatients are appropriate to refer to physical therapy: 75/85 = 88% agrees / strongly agrees • Knowledge - Unless there is a contraindication, I educate my inpatients to exercise or increase their physical activity while on my hospital unit: 71/85 …
Doherty-King et al, 2011 [17]	Not applicable	Not applicable	Nurses described patients as being in one of three phases: acutely ill, recovering, and getting-ready-for-discharge. The acutely ill phase is marked by physiological instability and is often relatively short. Reasons for mobilizing patients were consistent throughout the course of hospitalization (preventing complications). So if the first day, you know, they’re sick, we’re dealing with the acute…	Not applicable	Nurses described patients as being in one of three phases: acutely ill, recovering, and getting-ready-for-discharge. The acutely ill phase is marked by physiological instability and is often relatively short. Reasons for mobilizing patients were consistent throughout the course of hospitalization (preventing complications). “So if the first day, you know, they’re sick, we’re dealing with the acut…
Doherty-King et al, 2013 [76]	Not applicable	Not applicable	Some nurses (N = 10) interviewed attributed responsibility for ambulation to other disciplines, deferring decisions about initiating walking to either physical therapy (PT) or medicine. Nurses in this group focused on potential for injury to the patient (fall) or nurse (back injury) if they pursued walking the patient. Nurses waited for (1) PT clearance, (2) physician orders, (3) risks to decreas…	Not applicable	Nurses (N = 15) who claimed ambulation as primarily a nursing responsibility focused on the importance of ambulation for patient independence and psychosocial well-being. They acknowledged the risks involved in ambulating patients but consistently responded differently to these risks than the other group. They also identified written orders and insufficient resources (CNAs) as barriers to ambulat…
Douglas et al, 2004 [78]	Not applicable	Interviewees consistently reported that they had little or nothing to do during the day. There was little recreational facility or diversional activity available. Factors related to physical aspects of the built environment were perceived as either assisting or hindering patients’ daily activities in terms of accessibility and usability. Lighting was an important factor where many patients expres…	Not applicable	It’s patient-friendly when there’s something to occupy your mind during the day – a room to go and have a sit and a drink. (Female, 55–64 years) The most important thing is to be able to get a cup of tea when you feel like it – like at home – or have a smoke (in a special smoking room inside the hospital). On the maternity wards they have little kitchens – toaster/microwave/kettle – which would b…	Not applicable
Douglas et al, 2005 [77]	Not applicable	Each focus group reported specific difficulties with way finding, difficulties experienced with long corridors which did not offer places to rest or access to outside, inappropriate ward designs giving insufficient personal space, poor views of the natural environment from the bed and unsympathetic lighting and decor. Long corridors with lots of obstacles made it difficult to find way and to get …	Each focus group reported specific difficulties with way finding, difficulties experienced with long corridors which did not offer places to rest or access to outside, inappropriate ward designs giving insufficient personal space, poor views of the natural environment from the bed and unsympathetic lighting and decor.	The cafe and shopping mall gave a feeling of normality and somewhere to go with families and visitors. Respondents identified a number of facilities that catered for patients and their families across the hospital, for example, the children’s play area, the shopping areas and the restaurant and cafe’s. Respondents were asked for their views on each of these facilities. The shopping area received …	Not applicable
Eastham et al, 2016 [55]	Not applicable	Not applicable	Not applicable	Not applicable	The majority of participants also agreed that the “dementia friendly” ward environment had positively influenced patient and staff interaction, independence in personal hygiene and independence in mobility. However, only half of respondents agreed that “dementia friendly” principles positively influenced patient’ engagement in daily self-care activities. A mean score of five out of five was also …
Eijck et al, 2016 [43]	Not applicable	Not applicable	Quantitative survey results (Likert-score 1 to 5; < 3 is barrier, > 3 is a facilitator): Innovation characteristics: - Time investment M 2.85 (SD 0.67) Care provider characteristics: - Involvement M 2.60 (SD 1.02) - Knowledge, motivation M 2.02 (SD 0.88) - Education M 2.42 (SD 1.14) Patient characteristics: - Ethnicity M 2.81 (SD 0.72) Context characteristics: - Supportive staff M 2.71 (SD 0.73) …	Not applicable	Quantitative survey results (Likert-score 1 to 5; < 3 is barrier, > 3 is a facilitator): Innovation characteristics: - Specificality, flexibility M 3.45 (SD 0.57) - Didactive benefit M 3.29 (DS 0.64) - Compatibility M 3.48 (SD 0.70) - Attractiveness M 3.21 (SD 0.45) Care provider characteristics: - Lifestyle, working style M 3.90 (SD 0.82) - Doubts about innovation M 3.26 (SD 0.51) - Attitude, ro…
Gillis et al, 2008 [82]	Not applicable	Not applicable	A 9-point, Likert-type scale ranging from 1 (strongly disagree) to 9 (strongly agree), was used -> (1-4=no/disagree and 6-9 = yes/agree) Risk factors for deconditioning: • Bedrest M 8.54 (SD 1.11) • Insertion of a Foley catheter M 6.10 (SD 2.10) Perceived barriers to the prevention of deconditioning: • Inadequate staffing is the main reason preventative exercises are not done M 6.39 (SD 2.30) • N…	Not applicable	A 9-point, Likert-type scale ranging from 1 (strongly disagree) to 9 (strongly agree), was used -> (1-4=no/disagree and 6-9 = yes/agree) Nurses’ responses to attitudinal statements: • Nurses have an important role in the promotion of health and maintenance of fitness in older adults M 8.19 (SD 1.2) • Teaching the elderly and their families is a high priority in my practice M 7.34 (SD 2.3) • Nurse…
Gordge et al, 2009 [56]	Creating a communal dining room for patients. Incremental markers of 2m were placed with tape on the corridor walls so it could be easily determined what additional distances were travelled. An informative brochure on functional decline was created to be provided to participants.	Not applicable	Not applicable	The next phase of evaluation related to the trial of the dedicated dining room. Twelve patients were involved in the trial and each patient was asked to complete a survey evaluating the intervention. Although only five patients completed the survey overall the response to the dining room was very positive. Four (80%) patients felt it was worthwhile. All felt their mobility had improved and that t…	The staff surveyed (n = 11) were also very positive about the dining room. Ninety-two per cent felt it improved patient mobility and increased confidence to mobilise. All staff felt the project was worthwhile and 92% felt the activity should be continued
Graf et al, 2013 [57]	Not applicable	Not applicable	Older medicine patients were also described as being frailer, “sicker”, with significant co-morbidity, and often admitted without a clear diagnosis. The first hours to days of hospital admission may be spent making the appropriate diagnosis and establishing a treatment plan. This often meant that the patient required diagnostic tests and procedures that may impede mobilization. A nurse described …	These patients were from the oncology wing, and, when questioned about the frequency and duration of their hallway ambulation, they reported that their doctors had told them they must walk a minimum of two miles per day while hospitalized to prevent pneumonia and blood clots.	Patient motivation was a key factor that influenced mobilization, especially if patients were able to safely walk by themselves or with family members. Nurses reported that sometimes patients were very motivated to walk and had to ask the nurse to help them. Nurses believed it was their responsibility to initiate activities, and felt guilty when they had to be asked by patients or family members.…
Granger et al, 2018 [42]	Not applicable	Not applicable	Despite describing benefits, physiotherapists perceived that there was not enough evidence available (quantity and quality) supporting exercise for patients with lung cancer. They raised this as a barrier to embedding exercise into routine practice and felt this contributed to the lack of funding and services (with inability to justify the need for services) and poor medical buy-in. It was percei…	Not applicable	The success in integrating cardiac rehabilitation in routine practice was thought to be due to the well-established referral pathways which are facilitated by nursing staff completing referral documentation and strong evidence justifying cardiac rehabilitation following surgery. “Everyone [post-cardiac surgery] automatically gets a referral to do physio, in fact the ward clerk does the paperwork.…
Haines et al, 2013 [37]	Description of usual care: patients undergoing upper abdominal surgery are not provided with pre-operative physiotherapy assessment or treatment. They are routinely assessed on day one post-operatively with an emphasis on early mobilisation. Additional treatment is provided if patients are assessed to have clinically significant respiratory signs such as atelectasis or sputum retention. Weekend p…	Of the 64 patients seen by physiotherapy on day one, barriers to mobilisation were seen in 52% (33/64) of patients and hypotension was the most common barrier, seen in 61% (20/33) of these patients.	Not applicable	Not applicable	Not applicable
Holst et al, 2015 [81]	None reported	Organizational routines: (P7) “I would, but “a little cuckoo came into the machinery”. I was supposed to have a scan at 10. Before then, I had to drink 1 ½ liters of water and wait for the porter. Then it was postponed until 3 o`clock, so now I can sit here and drink 1 ½ liters of water again”. Most patients talked about the daily routines, which are also categorised as organizational in this int…	Not applicable	Praise and recognition from the staff: Patients found it very motivating when staff praised and recognised their effort to get out of bed. This was mentioned most often, if patients put on their own clothes and the effort thereby was more obvious. Recognition would keep patients from crawling back into bed. Boredom: Boredom from just lying in bed was common and could make patients get up. One pat…	Not applicable
Hoyer et al, 2015 [21]	Not applicable	Not applicable	For all survey items, a 5-point Likert response scale was used, with the following options: 1, strongly disagree; 2, disagree; 3, neutral; 4, agree; 5, strongly agree -> 1+2 = no, 4+5 = yes Attitudes: • Increasing mobilization of my inpatients will be more work for nurses: 79/100 = 79% yes The item with mean scores reflecting the highest perceived barrier by both rehabilitation therapists and nur…	Not applicable	For all survey items, a 5-point Likert response scale was used, with the following options: 1, strongly disagree; 2, disagree; 3, neutral; 4, agree; 5, strongly agree -> 1+2 = no, 4+5 = yes Knowledge: • I have received training on how to safely mobilize my inpatients: 85/101 = 84% yes • I understand which inpatients are appropriate to refer to physical therapy: 90/100 = 90% yes • Unless there is …
Jahn et al, 2012 [36]	All patients used the Nintendo Wii game console continuously for at least 30 minutes per day for a minimum of five days. Research staff members were present during all sessions to help with user problems or to take an active part in the game, at the patient’s request. The first session started with an introduction on how to use the device. The instructor provided an overview of available games, i…	Not applicable	Not applicable	Evaluation of an intervention: three patients responded positively when asked if they would play with the game console as an inpatient in the future. Two patients rated this question with “maybe,” one patient was undecided, and two patients said they would not play these kinds of games in the near future. Older patients reported that they preferred the less physically straining and less complex g…	Not applicable
Jonsson et al, 2018 [39]	Description of usual care: the key elements of the enhanced recovery program include the use of a preoperative nasogastric tube, an arterial catheter and antibiotics, surgery within 6 hours after decision to operate, perioperative fluid and pain management (thoracic epidural with local anesthetics and oral nonsteriodal anti-inflammatories [NSAIDs]), and early nutrition and mobilization. In additi…	Barriers for independent mobilization (asked to non-independent mobile patients) in the first postoperative week. • Fatique on postoperative day 4: 16/23 = 70% • Fatique on postoperative day 7: 8/15 = 53%	Not applicable	Not applicable	Not applicable
Juneau et al, 2018 [58]	SPRINT consists of four exercise categories color-coded according to a level of mobility. It covers all patients’ clinical profiles. Each category, but one, proposes two exercise subtypes. Subtype 1 can be done by the patient alone or with a caregiver or professional. Subtype 2 must be done exclusively under the supervision of a professional. All GAU professionals received a 20-min group training…	Poor balance was the barrier most frequently reported (55%) by participants. Pain (18%), weakness in the legs (18%), and avoiding tiredness before physiotherapy (9%) were also reported.	Difficulties most frequently reported by professionals were lack of time due to heavy workload (50%) and lack of collaboration / motivation from patients (21%).	Presence of a professional during the exercises was the facilitating factor most reported (44%) by participants.	Seventy-two per cent of professionals appreciated regular reminders to apply the SPRINT.
Kalisch et al, 2006 [75]	Not applicable	Not applicable	Ambulation: one area of missed care was ambulation of the patients. A few staff members stated that they “try” to ambulate the patients but often failed to do so. For example: NA: Sometimes a nurse will come and ask, ‘Can you walk this patient if you get time?’ If we get time, we can do it. But if we don’t, we can’t do it. We don’t do it. Occasionally one or two nurses in the focus groups stated …	Not applicable	Other participants from the same unit in one of the hospitals reported that they ambulated their patients “Because the physicians always ask if we have got the patients up when they make their rounds.”
Kanaski et al, 2018 [38]	Not applicable	Not applicable	Chair and bed heights vary creating additional challenges. The following discussion among three participants (P1, P2, and P3) further illustrates this point: P3: “Actually sometimes PT [physical therapy] gets them out into the chair and we have to get them back into the bed and it's not always as easy as it was when they put them out into the chair.” P1: “Right because the bed can be adjusted to …	Not applicable	Not applicable
King et al, 2016 [59]	MOVIN is an investigator-developed, nurse-driven intervention comprising five components: psychomotor skills training to increase RNs’ self-efficacy in determining whether it is safe for patients to ambulate and in helping older adults to ambulate, communication tools (e.g., ambulation white boards) to improve information sharing between nursing staff (CNAs and RNs) and other healthcare providers…	Not applicable	Not applicable	Not applicable	Nursing staff consistently described how they shifted ownership for patient ambulation from physical therapy to nursing. This was particularly the case for the 18 RNs who completed the psychomotor skills training component of MOVIN. During the skills training component, RNs were provided numerous opportunities to apply new knowledge related to performing mobility assessments and helping ill patie…
de Klein et al, 2019 [19]	Not applicable	Physical status: Patients often stated that their health status was, according to themselves, the main barrier for being physically active. The presence of medical devices was also cited as a barrier for physical activity. The level of physical functioning influenced patients’ attitudes regarding physical activity. This especially applied to the older patients and was confirmed by HCPs: ‘’Geriatr…	Physical status: One HCP stated that around 80% of the patients need assistance during walking. The presence of medical devices was also cited as a barrier for physical activity. All HCPs mentioned that patients are able to walk individually spend more time out of bed than functionally dependent patients. The level of physical functioning influenced patients’ attitudes regarding physical activity…	On the other hand, patients who have been admitted to the hospital more than once said they deliberately avoid the bed and eat at the table, due to previous experience with the negative consequences of long bed rest episodes. Aside from assistance and motivation provided by HCPs, HCPs and patients feel that physical activity can be made more attractive by adjustments in the hospital environment a…	It was stated by another nurse that the main reason for patients to get out of bed is boredom or because they cannot sit still, not because they completely understand why it is important. Aside from assistance and motivation provided by HCPs, HCPs and patients feel that physical activity can be made more attractive by adjustments in the hospital environment and providing a daily activity program.…
Koenders et al, 2018 [44]	Not applicable	All patients and health care providers stressed the importance of achieving a goal with physical activity. Being physically active during their hospital stay without a purpose or certain goal felt unnatural for both patients and health care providers. According to the patient and health care providers, it was very important to find a balance between physical activity and rest. Patients told that …	All patients and health care providers stressed the importance of achieving a goal with physical activity. Being physically active during their hospital stay without a purpose or certain goal felt unnatural for both patients and health care providers. The hospital bed played an important role within the hospital environment as health care providers visited patients at their bedside, examinations …	All patients and health care providers stressed the importance of achieving a goal with physical activity. Being physically active during their hospital stay without a purpose or certain goal felt unnatural for both patients and health care providers. Several meaningful activities related to physical activity during hospital stay, such as “moving on music”, gaming, and “going to the restaurant” a…	Health care providers stated that it was not “the more, the better” when it comes to physical activity of patients during hospital stay. Both patients and health care providers pointed out that physical activity during hospital stay should be well-balanced with both physical and mental rest. “A balance between physical activity and rest is, I think, very important. Patients need physical activity…
Kouchel et al, 2017 [60]	Not applicable	Not applicable	Quantitative: Survey: 5-point Likert-scale: Strongly agree, somewhat agree, neither agree nor disagree, somewhat disagree, strongly disagree. Strongly agree + somewhat agree = yes, somewhat disagree + strongly disagree = no. • Nurse-to-patient staffing is adequate to mobilize inpatients on my unit: 14/27 = 52% no • Increasing mobilization of my inpatients will be more work for nurses: 18/27 = 67%…	Not applicable	Quantitative: Survey: 5-point Likert-scale: Strongly agree, somewhat agree, neither agree nor disagree, somewhat disagree, strongly disagree. Strongly agree + somewhat agree = yes, somewhat disagree + strongly disagree = no. Qualitative: My inpatients are too sick to be mobilized: 17/28 = 61% no • I have received training on how to safely mobilize my inpatients: 26/28 = 93% yes • Increasing mobil…
Lafreniere et al, 2017 [79]	Not applicable	Patients listed many strategies to recover and maintain physical abilities and autonomy (see section ‘enablers’.) They would have liked to apply more active strategies but could not on account of barriers, including fatigue and pain from illness. Only one participant stated that staying put was a lifestyle choice. Barriers to applying strategies: prevention strategies seemed difficult to apply, h…	Not applicable	The majority were aware of the ravages of inactivity as evidenced by the list of reasons mentioned to justify their choice not to remain inactive in hospital: avoid loss of abilities and strength, maintain capacity to move, recover (“It seems to make me stronger.”), keep up morale, “stop being in the situation of someone who is sick,” stay lucid, digest food better, and avoid blood clots. The maj…	Not applicable
Leak Bryant et al, 2017 [61]	Patients who agreed to participate were randomized to either the control or intervention group. Participants in the intervention arm participated in an individualized, mixed-modality exercise program supervised by exercise sport science specialists. Participants were approached four times a week, twice per day (morning and afternoon session) for aerobic (walking or stationary bike) and resistance…	The most common barriers to exercise were closely connected with the role of physical and psychological symptoms. “Well, there were a couple of times when I had to cancel it because either I wasn’t feeling right or it conflicted with something having to do with my treatment. So the fixed schedule nature of it was a little inflexible, which I understand, although there were a couple of sessions th…	Not applicable	Recovery from the symptoms of acute leukemia and side effects of treatment, motivation, and social connectedness were commonly reported benefits. All participants reported benefits of the structured exercise intervention. These benefits were both physical and psychological. One participant reported, “[The] exercise that I did, it made me feel better.” Another participant was more specific. “All t…	Not applicable
Lee-Steere et al, 2020 [73]	A multisite randomised controlled trial of an Australian delirium prevention programme Eat Walk Engage (EWE)	People's willingness to participate in activities in hospital was shaped broadly by their world view and life perspectives. People expressed that their motivation and attitudes towards being involved in these activities in hospital were shaped by some stable aspects of their personality, for example how sociable, flexible and open to new experiences, tenacious, conscientious and resourceful (able…	Not applicable	Most participants described being aware of the benefits of maintaining nutrition and hydration, physical activity and cognitive activity in hospital. I think it's necessary that people are moving so they don't become moribund. They don't become. Don't um. They lose their facilities. (Sam) Because you deteriorate. That's what you do. Your bones and your legs and your brain and everything deteriora…	Not applicable
Lim et al, 2019 [62]	Participants in the control group, receiving usual care, were seen by therapists on average twice weekly until they were functionally back to baseline or when they had reached a new baseline. Participants in the intervention group received twice-daily volunteer-led mobility or bedside exercises on the ward. Participants were assessed by the therapy team who prescribed individualised activity. Par…	Clinical factors such as the busy clinical environment, space limitation around patient’s bed space, frequent patient transfers and physical restrictions such as urinary catheters and intravenous medications were cited as barriers to the delivery of the PA intervention.	Clinical factors such as the busy clinical environment, space limitation around patient’s bed space, frequent patient transfers and physical restrictions such as urinary catheters and intravenous medications were cited as barriers to the delivery of the PA intervention. Volunteers also found the ward environment to be intimidating initially. However, as they became familiar with their role, it be…	Recognising the importance of PA: Patients and volunteers also showed understanding of the importance of being physically active. “I think it’s a matter of keeping the body mobile which is the important thing. I’ve been in hospital now six times with pneumonia and fortunately, and luckily for me, I’m physically fit I can get out of bed every day. Yeah, so to get somebody mobile I think is half th…	Recognising the importance of physical activity: nurses and therapists were aware of the adverse effects of physical inactivity and appreciated the potential benefits of the intervention in encouraging maintenance of physical activity levels and preventing functional decline. Patients and volunteers also showed understanding of the importance of being physically active. All four key stakeholders …
Lim et al, 2020 [72]	Not applicable	Patient’s fear of fall: Older patients in the hospital were less inclined to ambulate by themselves because of the fear of falling and the dire consequences. The family carers were equally worried for the patients as well. “.. I’m a bit frightened lah. Afraid I fall down or what. . . Yeah I fear that I will fall, and then I cannot go anywhere.” (Patient 9.209) Fear of burden to nurses: Many times…	Fall prevention initiatives deterred against physical activities: It was common for nurses to initiate fall prevention management, especially when patients were identified at risk of fall. However, the need to reinforce fall prevention care to patients could become obstacles to patient mobilization. “that’s why all of my nurses so afraid. So that’s why my nurses want to accompany the patient beca…	Awareness of the need for mobility: Despite placing an emphasis on bed rest, there seemed to be also some awareness among patients and carers of the need to mobilise during the hospitalization. “I try to walk slowly myself, I don't want to sleep on the bed most of the time. You know, I try to move around, walk around a bit.” (Patient 9.147)	Knowledge of patients’ conditions: Nurses also felt it was essential to have good knowledge of patients’ conditions in evaluating the level of assistance required. Only with proper assessment, nurses could then determine if patients would be “allowed” to leave their bed and ambulate independently. “. . .get to know their diagnosis whether they are independently able to walk on their own or they n…
Lyon et al, 2014 [80]	Evaluation of the implementation and functioning of a Enhanced Recovery After Surgery (ERAS) program. The program is not described into further detail.	Not applicable	But it’s still the natural thing for the patient to think if I’m sick I go to bed. Patient expectations centered on preconceived ideas that patients may hold regarding their hospital journey and discharge. If the patient has unrealistic expectations of the postoperative course, the mobility or eating requirements of the ERAS care pathway may be difficult for them to comply with.	Not applicable	Not applicable.
Meesters et al, 2019 [63]	Not applicable	Not applicable	Not applicable	73% of the patients reported that they were sufficiently informed about physical activity during their hospital stay.	Not applicable
Moore et al, 2014 [18]	Mobilization of Vulnerable Elders in Ontario (MOVE ON) is an evidence-informed quality improvement intervention designed to promote early mobilization and prevent functional decline in older patients admitted to hospitals. We proposed a multicomponent inter-professional strategy to promote mobilization, which was tailored to the context of each participating hospital. The core components of the i…	Not applicable	There were several barriers identified at the health-care provider level, such as lack of knowledge about the benefits and importance of early mobilization, attitudes and beliefs about mobilization, a perceived lack of skills to implement the MOVE ON intervention, and fear of injuring the patient. However, time constraints and heavy workload were the most commonly mentioned barriers by health-car…	Not applicable	As required, all sites implemented education-based activities such as classroom and electronic modules across the unit. Additional tailored activities developed by the participating units included documentation- related activities, appointment of mobility champions, and distribution of promotional materials and reminders for staff. One example of a documentation activity was the ‘mobility clock’,…
Moreno et al, 2019 [64]	Both groups received usual hospital care for their clinical condition, as determined by the hospital staff. In addition, the experimental group received verbal advice and a booklet with information about the deleterious effects of hospitalisation and the importance of staying physically active during hospitalisation.	Quantitative - ‘yes’ or ‘no’ answers: The main barriers to staying active during hospitalisation that the participants reported were: • Lack of space – 44/58 = 76% • Continuous oxygen therapy – 14/23 = 61% • Fear of infection – 29/58 = 50% • Lack of companion encouragement – 26/39 = 66% Qualitative – open ended questions: The open-ended questions also elicited some barriers that were additional t…	Not applicable	Quantitative - ‘yes’ or ‘no’ answers: • Knowing the importance of moving during hospitalisation: 44/58 (76%) • Receiving advice about staying active during their admission: 39 /58 (67%) Qualitative – open ended questions: Phrases such as ‘moving during hospitalisation improves or maintains function’, ‘staying immobile is bad for health’, and ‘moving improves the breathing’ were answered on the op…	Not applicable
Mudge et al, 2015 [11]	The Eat Walk Engage (EWE) program was designed to embed successful strategies into routine practice. The program aimed to engage the interdisciplinary care team to recognize the care needs of older patients, recognize care gaps, and take responsibility for local sustainable solutions. Specific aims of the program were to support adequate nutritional intake, promote early exercise and ambulation, …	Not applicable	Not applicable	Participants were asked to comment on their perceived importance of keeping up with everyday personal activities such as eating, taking a walk, or doing something to keep their mind active in hospital. All participants agreed that these were important, revealing a range of motivating factors. These included avoiding further loss of function—“You turn into a jellyfish just staying in bed,” “You ha…	Clinical strategies to address program aims were proposed by a small operational group representing nursing, medicine, and allied health professionals, who were invited to participate in consultation with the nurse unit manager, based on their clinical role and recognition as opinion leaders. Clinical strategies to enhance mobility / functional recovery: -Encourage and assist sitting out of bed (…
Murphy et al, 2018 [65]	Not applicable	The majority of participants lacked understanding of why doing physical activity was beneficial. Participants think there are risks from participating in PA, with problems potentially occurring if the amounts of usual activity are exceeded.	Not applicable	The majority of participants thought doing physical activity (PA) was important because of its benefits for physical and mental health, and because not doing it was hazardous for health. “If you don’t do any physical activity… you will cause all kinds of problems for your health” (Pt2.51M). “It is important for all sorts of reasons… being healthy, keeping fit… to do with wellbeing” (Pt4.65F). Par…	Not applicable
Nesbitt et al, 2012 [66]	The patients ambulated once in the hallway using either the standard method of ambulation or the intravenous pole/walker. During the next episode of ambulation, the other method of ambulation was used. Random sequencing was used and patients walked the same distances each time. There was no preset walking distance. Each patient determined his or her ambulation duration and distance that was the s…	Not applicable	Our nurses also noted that the immediate postoperative period is more difficult to walk a patient than the late postoperative period because more monitoring and critical care devices are likely to be attached. During this time, as opposed to the late postoperative period, patients are more infirmed by pain, weakness and fatigue. Our leadership team determined that an episode of hallway ambulation…	Patient satisfaction scores showed significant (p < 0.001) differences in the ability of the intravenous pole/walker (IVPW) to facilitate ambulation and to provide support while ambulating in comparison with the standard method of ambulation (SMA). When asked if the method ‘very well’ provided support and assistance, 65% of patients (25/38 patients) responded affirmatively following use of the IV…	• In your opinion as a nurse, does the intravenous pole/walker (IVPW) facilitate ambulation? 34/35 = 97% yes • In your opinion as a nurse, does IVPW system appear safe for ambulation? 26/35 = 74% yes Nurses noted that the IVPW better facilitated ambulation and was safer compared with the standard method of ambulation (SMA). When queried regarding the system’s ability to facilitate ambulation, onl…
Parke et al, 2010 [84]	Not applicable	Architectural features can contribute to older participants' stress, fear, anxiety, and worry by interfering with independent way-finding, promoting deconditioning that limits recovery. One participant explains how clutter and crowding contributes to worry and anxiety in older patients, which affects their ability to mobilize after surgery: “If you have a walker in front of you, you can't get int…	Architectural features can contribute to older participants' stress, fear, anxiety, and worry by interfering with independent way-finding, promoting deconditioning that limits recovery. One participant explains how clutter and crowding contributes to worry and anxiety in older patients, which affects their ability to mobilize after surgery: “If you have a walker in front of you, you can't get int…	Not applicable	Not applicable.
Persson et al, 2015 [67]	Not applicable	It was rarely necessary for patients to leave the room because most of the treatments were carried out in the room. Professionals like occupational therapists and physiotherapists came to the patients’ room. Spaces outside the room, such as corridors and day rooms, were hardly used. However, the design was appreciated, and these spaces were good to have for walking around or when one needed a bre…	Not applicable	Not applicable	Not applicable
Rasmussen et al, 2020 [74]	Not applicable	Not applicable	Health professionals at the hospital experienced that frail older people were often confused, tired and lacking motivation for being active, as well as experiencing the acute admission as being chaotic. In addition to being affected negatively, both mentally and physically, hospital personnel described frail older patients as coming from a generation believing in bedrest when ill, which contrasts…	Not applicable	Health professionals experienced themselves as the driving force in getting patients active in relation to physical activity and nutrition: The health professionals, primarily at the hospital, described different ways of trying to help frail older people with mobilisation and nutrition. These approaches included providing information about symptoms and ways of handling them, intensified messages …
Rosbergen et al, 2017 [68]	The enriched environment intervention embedded in the acute stroke unit focused on three key areas summarised briefly below. 1. Embedding a stimulating environment in the acute stroke unit through creation of public communal spaces and provision of stimulating resources, for example, newspapers, iPads, books and games throughout the ward and at the patient bedside. We commenced daily communal bre…	Not applicable	Staff acknowledged that the enriched environment could be challenging at times of competing priorities. However, other nursing staff members experienced that implementing enrichment strategies was very challenging when high acuity patients were on the ward and during very busy shifts, for example, high patient turnover. Nursing staff reported that higher priorities at these times limited their ca…	Not applicable	Nursing and allied health staff expressed that the enriched environment created more opportunities for patients to be physically, socially and cognitively active during the day as compared with usual care. Staff perceived that the enriched environment positively contributed to patients’ recovery. Staff perceived that the acute stroke unit shifted from ‘acute care’ to ‘acute care and recovery’ for…
Sepulveda-Pacsi et al, 2016 [69]	Not applicable	Not applicable	Nurses were asked about what barriers compete with their ability to ambulate patients on their unit. Factors perceived as competing with ambulation of patients: • Inadequate number of assistive or clerical staff (n=154, 80.2%) • Inadequate number of staff (n=151, 78.6%) • Urgent patient situations (n=139, 72.4%) • Unexpected rise in patient volume and/or acuity on the unit (n=130, 67.7%) • Heavy …	Not applicable	• Knowledge: In terms of their knowledge about patient ambulation, the majority of the nurses rated themselves as knowledgeable (n = 174, 91%). • The majority of nurses felt that early and frequent ambulation was extremely important in a patient's stay (n = 190, 99%) • Importantly, the majority also felt that it is the RN's role and responsibility to ambulate patients (n = 149, 79.3%). • Results …
So et al, 2012 [14]	Not applicable	Barriers were reasons participants gave for not exercising in the hospital or why exercise in the hospital was seen as particularly difficult. Symptoms were the most common barrier to in-hospital exercise, mentioned by 71% of participants. Symptoms included weakness (29%), fatigue (29%), pain (18%), shortness of breath (14%), dizziness (11%), nausea (4%), and stiffness (4%). One participant state…	Not applicable	Motivating factors were reasons participants gave to explain their exercise behavior or their desire to exercise in the hospital. Half of the participants mentioned the motivating factor of avoiding the negative effects of bed rest, including avoiding boredom (21%), pain or decline (18%), fatigue (7%), and inactivity (7%). Avoiding boredom was a powerful motivator for exercise. One participant st…	Not applicable
Tang et al, 2013 [70]	The exercise rehabilitation programme involved supervised twice-daily 15 minutes physiotherapy sessions that included both resistance and aerobic training from the second day of admission to hospital till the day of discharge in addition to standard physiotherapy treatment. Depending on allocation, participants were either required to exercise at a low intensity (40% maximal intensity) or at a mo…	Perceptions from participants that symptoms and co-morbidities had hindered their ability to participate in the programme had emerged during the interviews. In the context of a positive experience, there were comments on challenges within the programme. Comments about the frequency of exercising were also made whereby exercising twice a day was too often. It was also suggested that the duration o…	Not applicable	An increase in provision of information regarding the benefits of exercise was felt to have enhanced the effectiveness of the programme. The exercise programme kept them active while in hospital compared to their previous inpatient physiotherapy experiences. The presence of someone supervising and explaining the purpose of their exercises gave them a deeper understanding as to the importance of e…	Not applicable
Zisberg et al, 2018 [71]	The Systems Engineering Initiative for Patient Safety (SEIPS 2.0) model has the potential to guide a sustainable, site-tailored mobility intervention. This study demonstrated an adaptation process guided by the SEIPS 2.0 model to articulate site-specific, culturally based interventions to improve in-hospital mobility among older adults. The following interventions to increase awareness to mobilit…	Negative-to-neutral attitudes toward mobility at time of hospital admission were significantly related to walking fewer than 900 steps during hospitalization, and the odds of low mobility were 3.22 (95% CI: 1.24–8.44) times higher for patients holding negative-to-neutral attitudes than for those with positive attitudes, even when controlling for objective mobility ability on admission, severity o…	When asked about tools for mobility support, the team mentioned a lack of resources of mobility aids, especially the limited walkers available to use. It was not clear who was responsible for “prescribing” mobility and who was responsible for directly assisting patients. Exploring the Ministry of Health regulations and policies, that is, the external environment, revealed a formal document that d…	Most participants had positive attitudes regarding inpatient mobility (3. 36 ± .97, on 1–5 scale), with 65% (131) expressing above-neutral values.	Analysis of organizational factors demonstrated several strengths that may support practice and policy changes. For example, a tradition of strong teamwork and willingness to adopt new practices were described by the teams. In addition, a well-structured training system for different purposes exists in the hospital, as well as management willingness to invest money to support the proposed changes…
